# Supplementary material for: 3-Phenyl-4-acyl-5-isoxazolonate complex of Tb3+ doped into poly-β-hydroxybutyrate matrix as a promising light-conversion molecular device
Source: Royal Society of Chemistry journal article supplement (doi:10.1039/b905304b), 2009-01-01
Supplement: b905304b.pdf [file b905304b.pdf]

## **Supplementary Information**

### **3-Phenyl-4-acyl-5-isoxazolonate complex of Tb<sup>3+</sup> doped into poly- $\beta$ -hydroxybutyrate matrix as a promising light-conversion molecular device**

**Silvanose Biju<sup>a</sup>, M. L. P. Reddy<sup>a\*</sup>, Alan H. Cowley<sup>b</sup> and Kalyan V, Vasudevan<sup>b</sup>**

<sup>a</sup>*Chemical Sciences and Technology Division, National Institute for Interdisciplinary Science & Technology (NIIST), Thiruvananthapuram-695 019, India*

<sup>b</sup>*Department of Chemistry and Biochemistry, The University of Texas at Austin, 1 University Station A5300, Austin, Texas 78712*

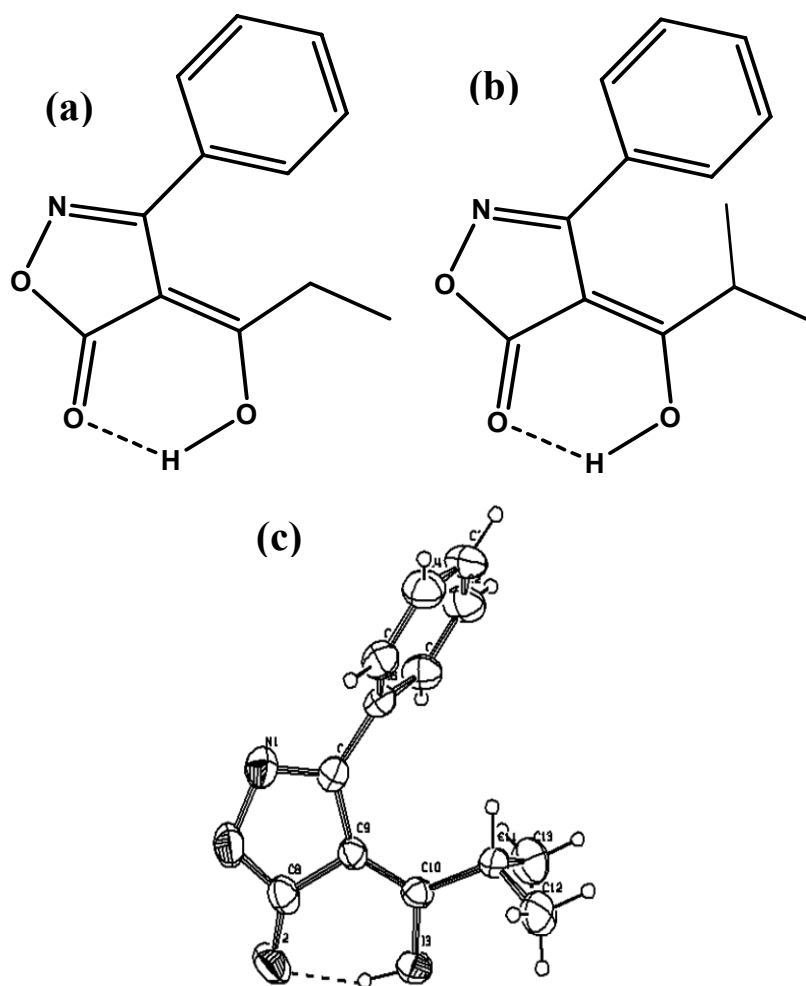

**Fig. S1** Structural formulas for the HPPI (a) and HIBPI (b) ligands. (c) X-ray structure of the HIBPI ligand. Thermal ellipsoids were drawn at the 30% probability level.

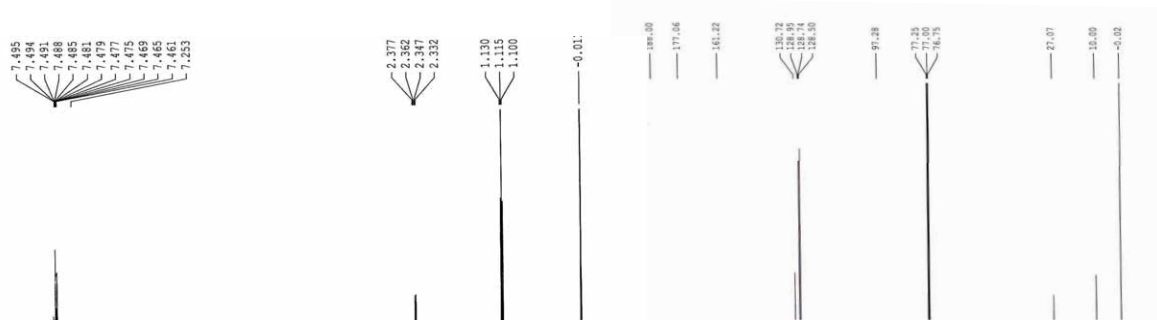

**Fig. S2** 500MHz  $^1\text{H}$  and  $^{13}\text{C}$  NMR spectra of the ligand HPPI.

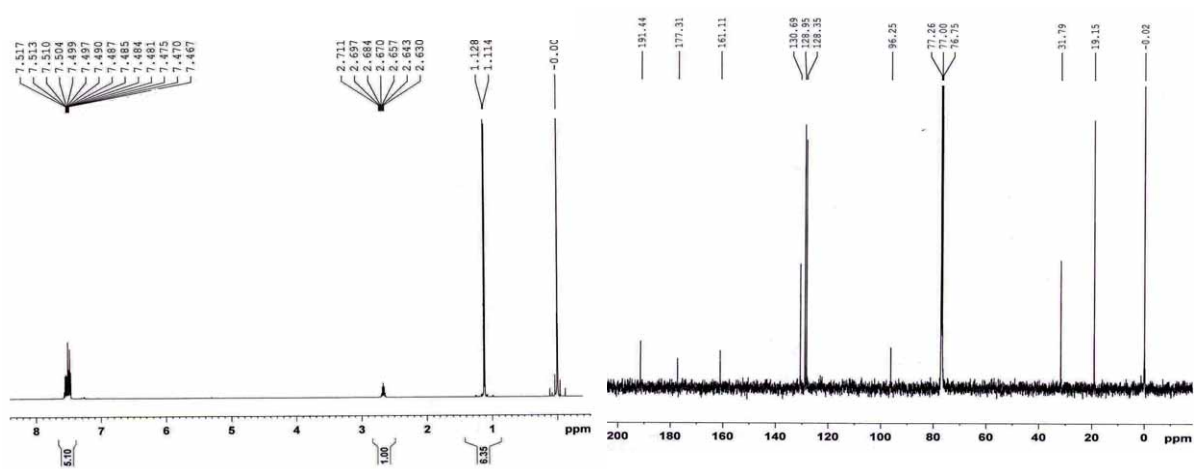

**Fig. S3** 500MHz  $^1\text{H}$  and  $^{13}\text{C}$  NMR spectra of the ligand HIBPI.

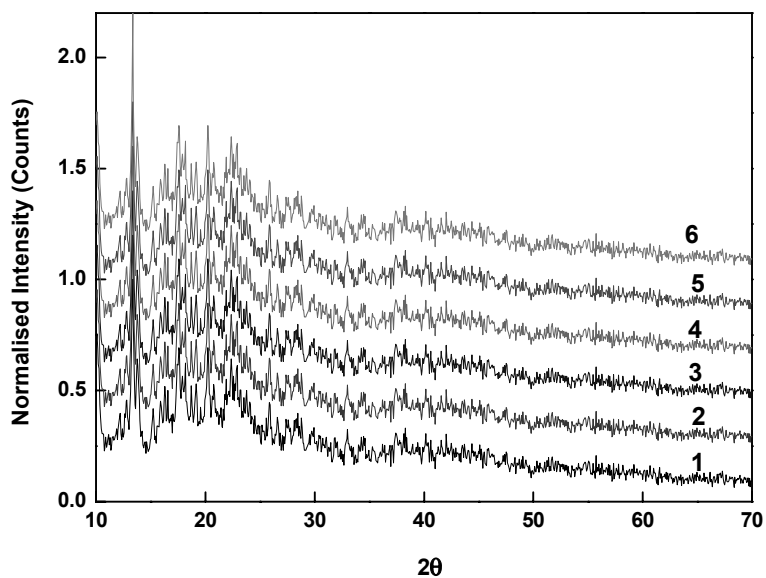

Fig. S4 XRD patterns for complexes 1-6.

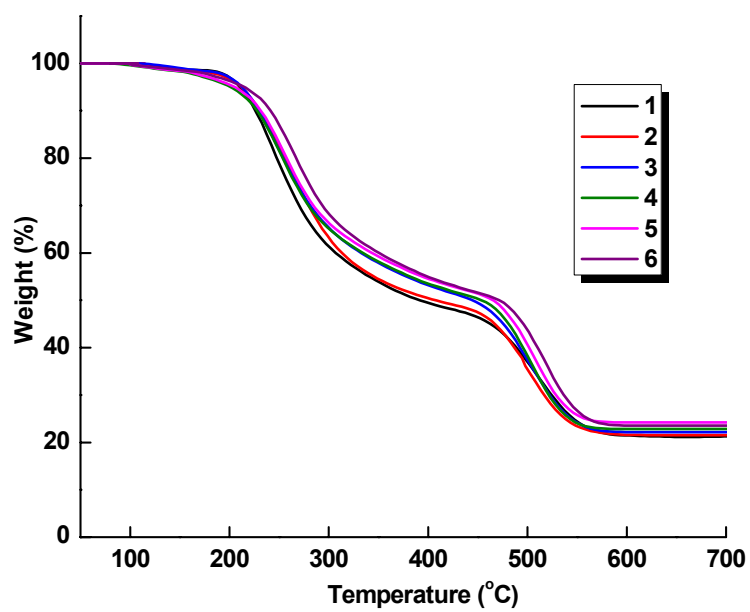

Fig. S5 Thermogravimetric curves for the Ln<sup>3+</sup> complexes 1-6.

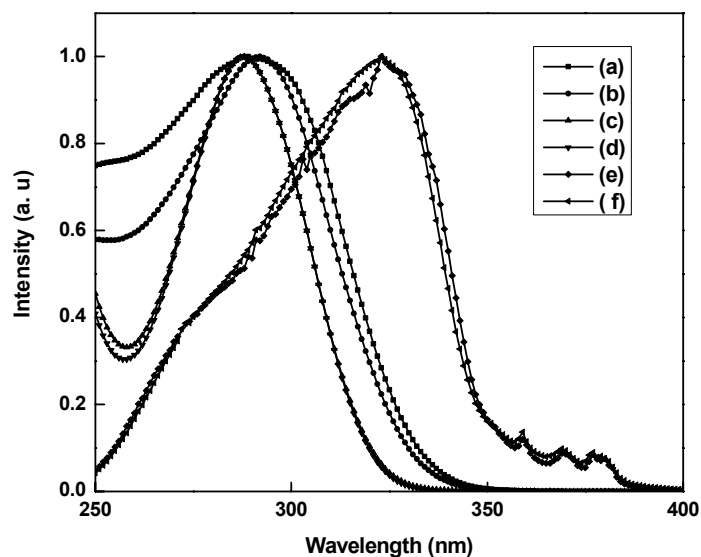

**Fig. S6** UV-vis absorption spectra of HPPI (a) and HIBPI (b); UV-vis absorption spectra of **1** (c) and **2** (d); and excitation spectra of complexes **1** (e) and **2** (f). The excitation spectra is recorded in solid state, and absorption spectra were in CH<sub>3</sub>CN ( $c = 2 \times 10^{-5}$  M). All spectra are normalized to a constant intensity at the maximum.

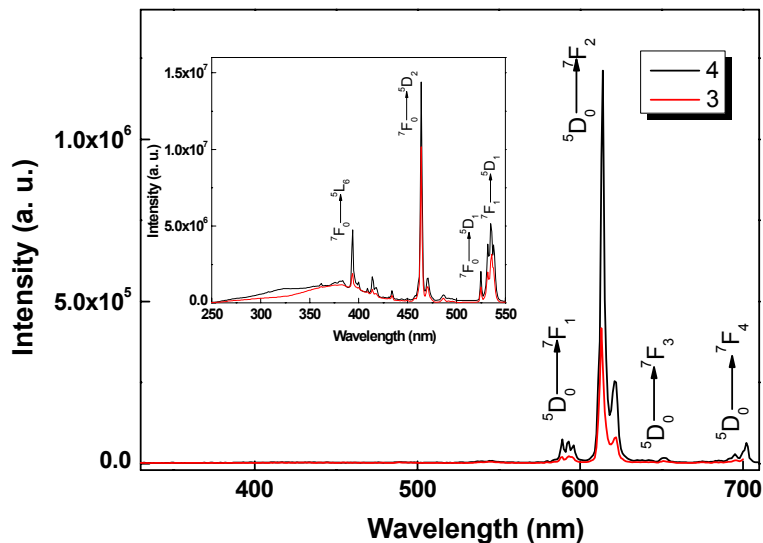

**Fig. S7** Solid state excitation (shown in inset) and emission spectra for complexes **3** and **4** at 298 K ( $\lambda_{\text{ex}} = 320$  nm and emission monitored around 614 nm).

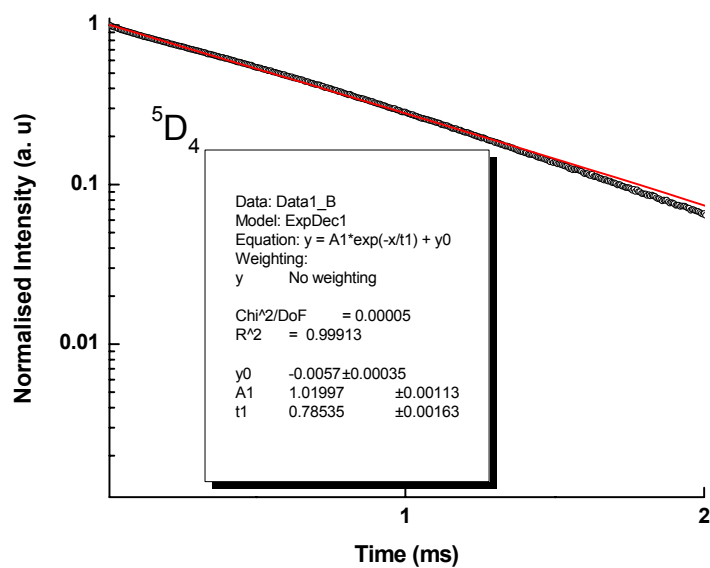

**Fig. S8** Experimental luminescence decay profiles for complex **1** at 298 K (in solid state) monitored around 545 nm and excited at 320 nm.

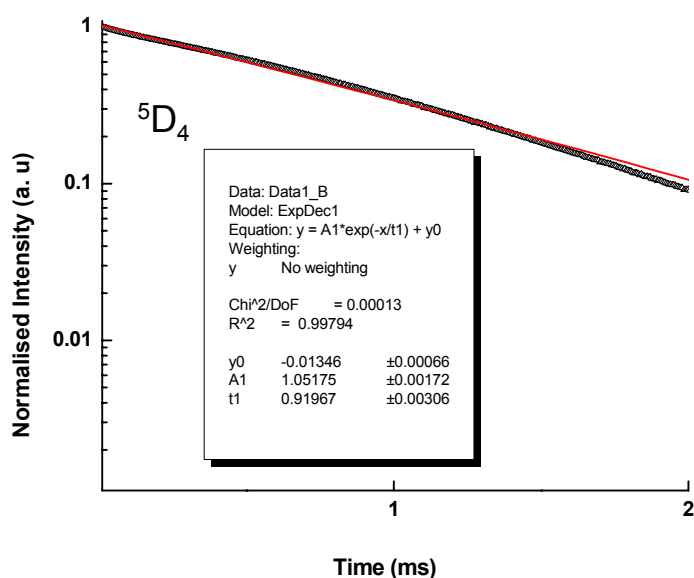

**Fig. S9** Experimental luminescence decay profiles for complex **2** at 298 K (in solid state) monitored around 545 nm and excited at 320 nm.

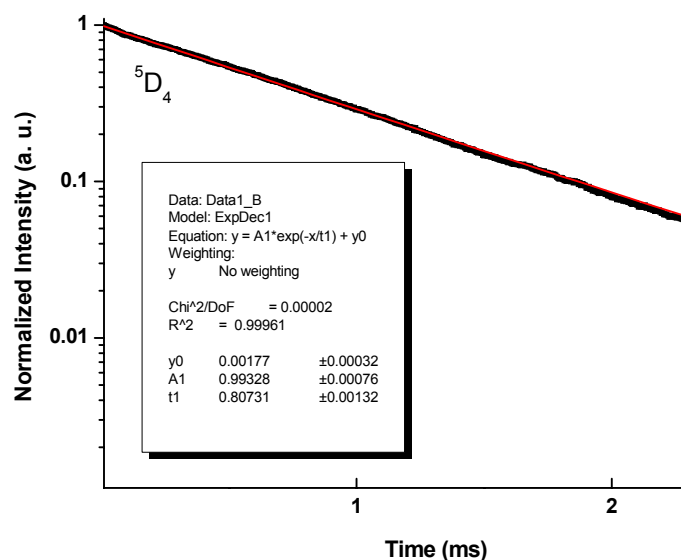

**Fig. S10** Experimental luminescence decay profiles of complex **1** at 77 K in  $CDCl_3$  monitored around 545 nm and excited at 320nm.

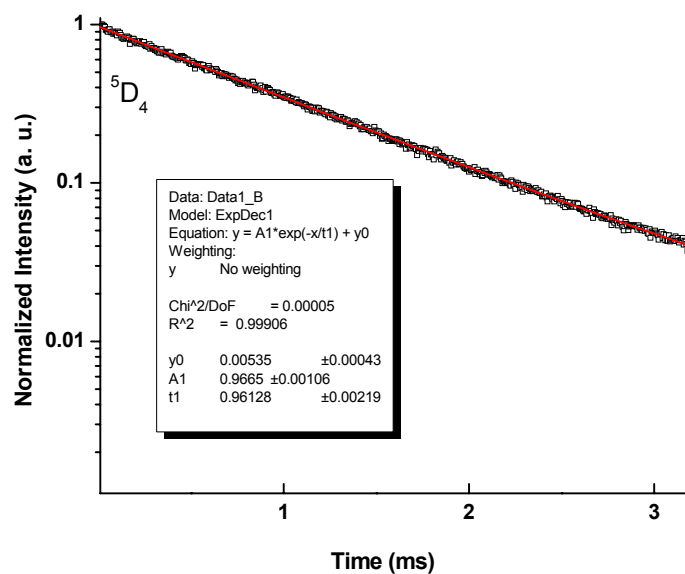

**Fig. S11** Experimental luminescence decay profiles of complex **2** at 77K in  $CDCl_3$  ( $c = 2 \times 10^{-5}$ ) monitored around 545 nm and excited at 320nm.

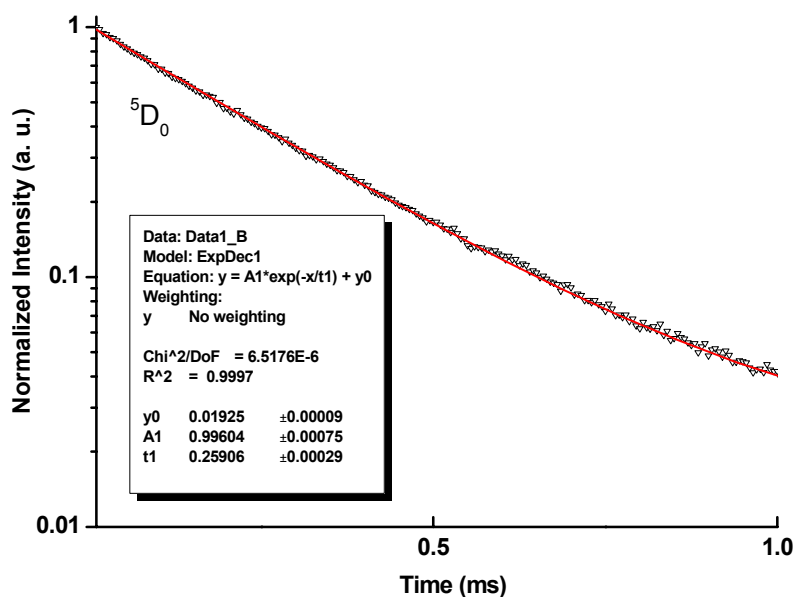

**Fig. S12** Experimental luminescence decay profiles for complex **3** at 298 K (in solid state) monitored around 614 nm and excited at 320 nm.

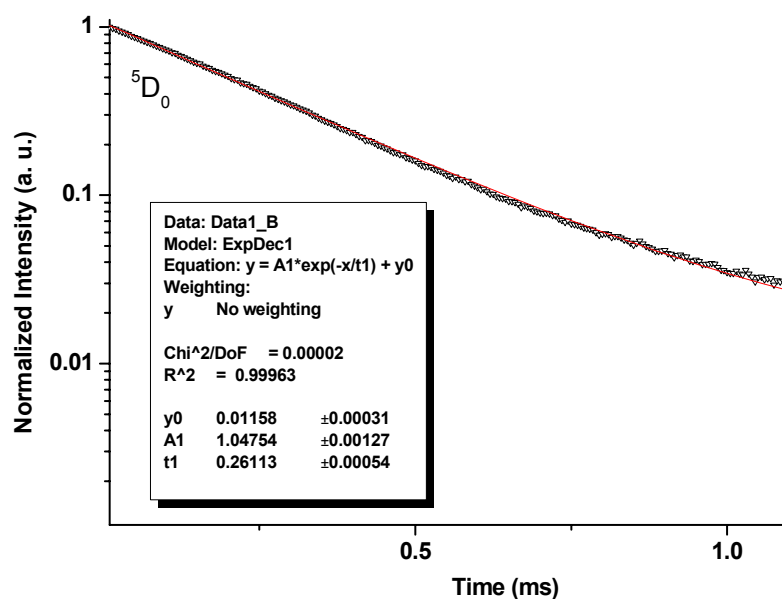

**Fig. S13** Experimental luminescence decay profiles for complex **4** at 298 K (in solid state) monitored around 614 nm and excited at 320 nm.



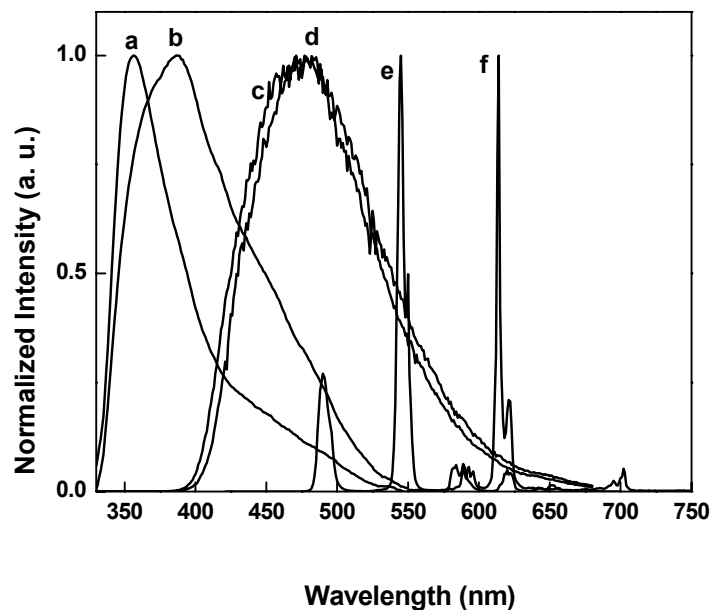

**Fig. S14** Room-temperature emission spectra of the ligands HPPI (a), HIBPI (b) and complexes **2** (e), **4** (f) and low-temperature (77K) phosphorescent spectra of complexes **5** (c) and **6** (d) in CH<sub>3</sub>CN solution ( $c = 2 \times 10^{-5}$ ).

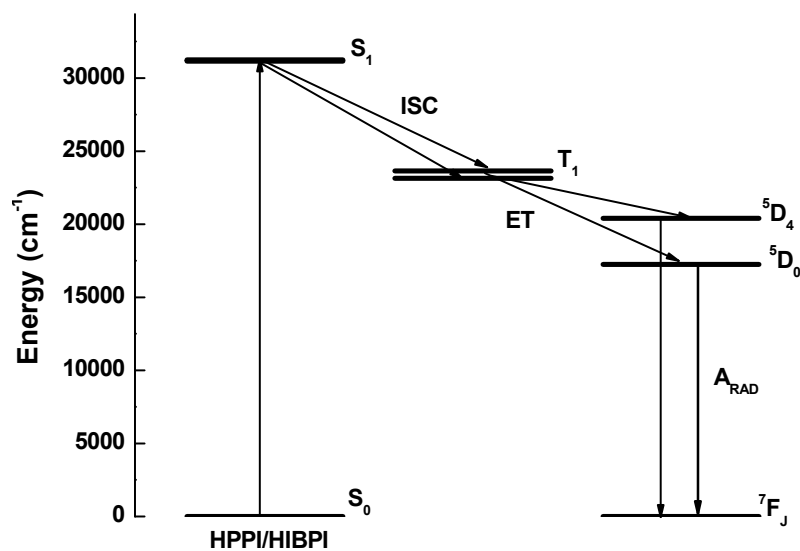

**Fig. S15** Schematic energy level diagram and energy transfer processes: S<sub>1</sub>, first excited singlet state; T<sub>1</sub>, first excited triplet state.

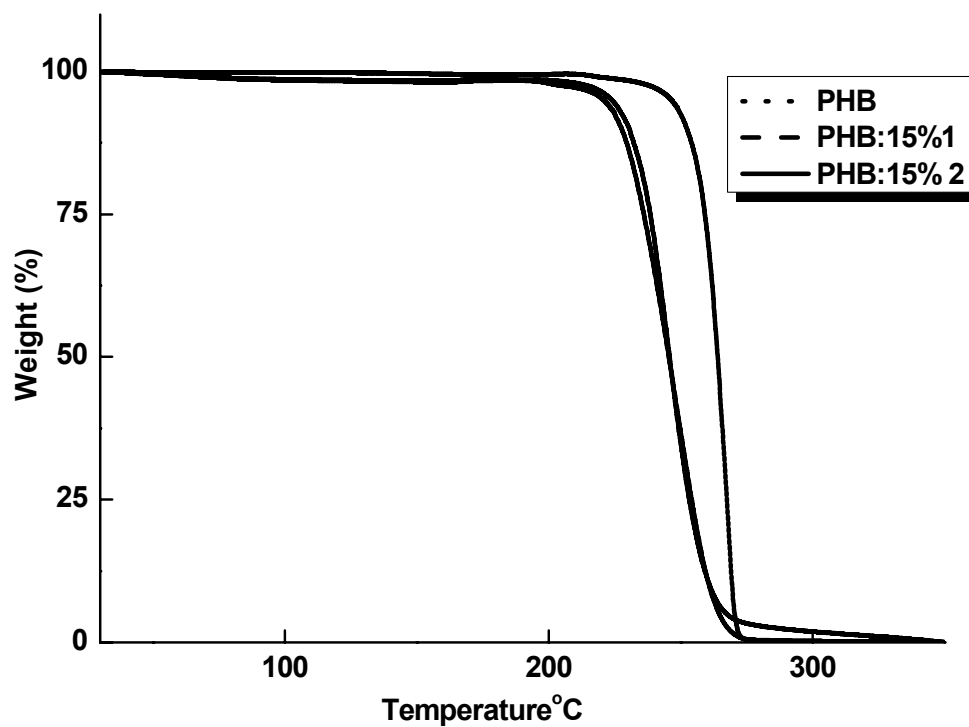

**Fig. S16** Thermogravimetric curves for the doped and undoped PHB polymer films.
